# Supplementary material
Source: Springer Nature journal article supplement (https://www.springermedizin.de/resource/supplementary/13046_2012_657_MOESM4_ESM.pdf/9662656)

## Control supernatant

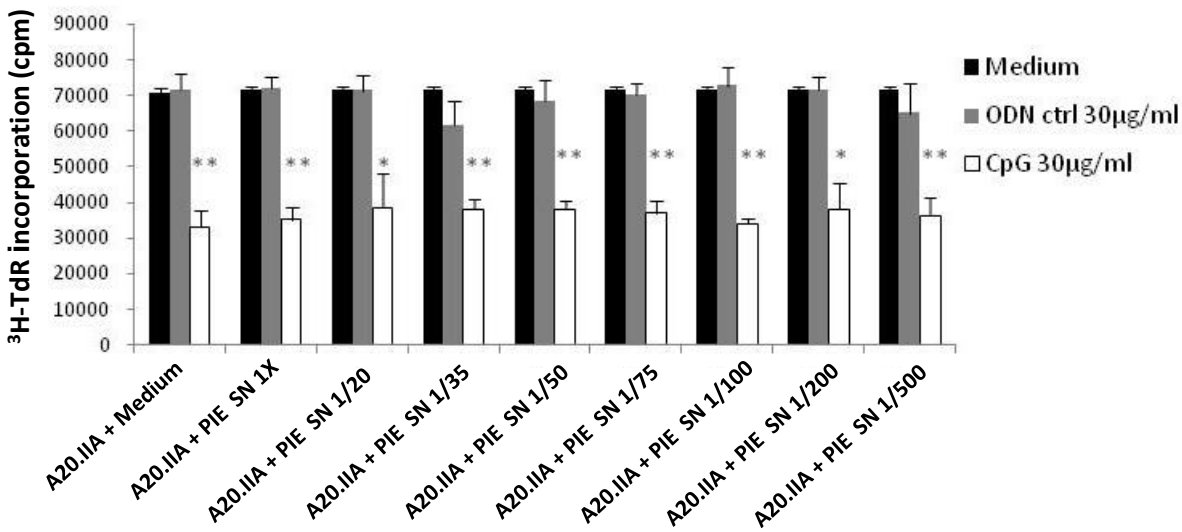

## PIOL supernatant

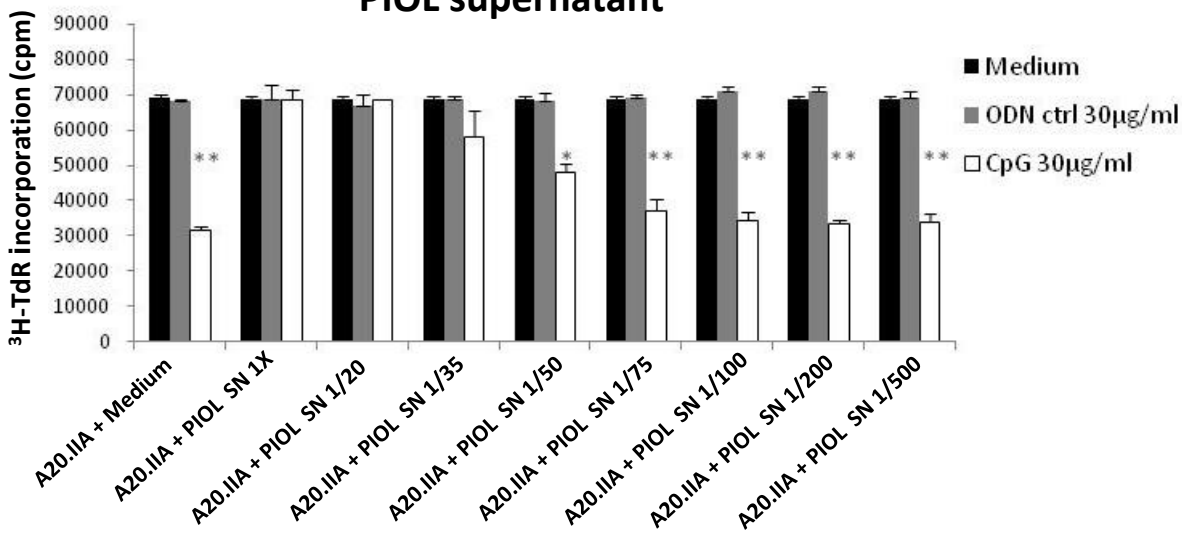

Supplement: MOESM4 [file 9662656]
